# Supplementary material for: Semiology, clustering, periodicity and natural history of seizures in an experimental occipital cortical epilepsy model
Source: PubMed Central journal article supplement (PMC6307909; doi:10.1242/dmm.036194), 2018-12-14
Supplement: dmm-11-036194-s1.pdf [file dmm-11-036194-s1.pdf]

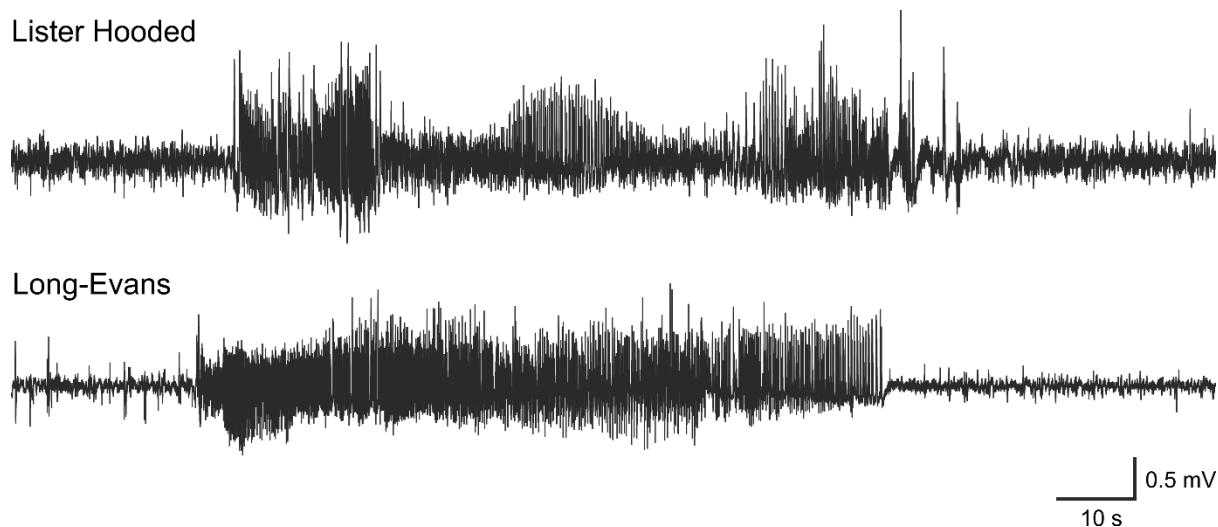

**Figure S1. Representative seizures from Lister Hooded and Long-Evans rats.** The TeNT model of occipital cortical epilepsy can be induced in other rat strains.

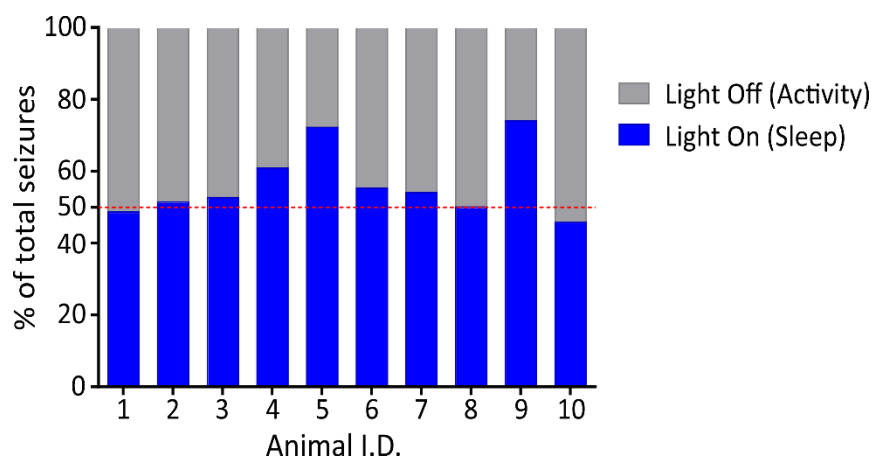

**Figure S2. Distribution of seizure occurrence during day and night for individual animals.** There are higher proportions of seizures during sleeping period in most of the animals.

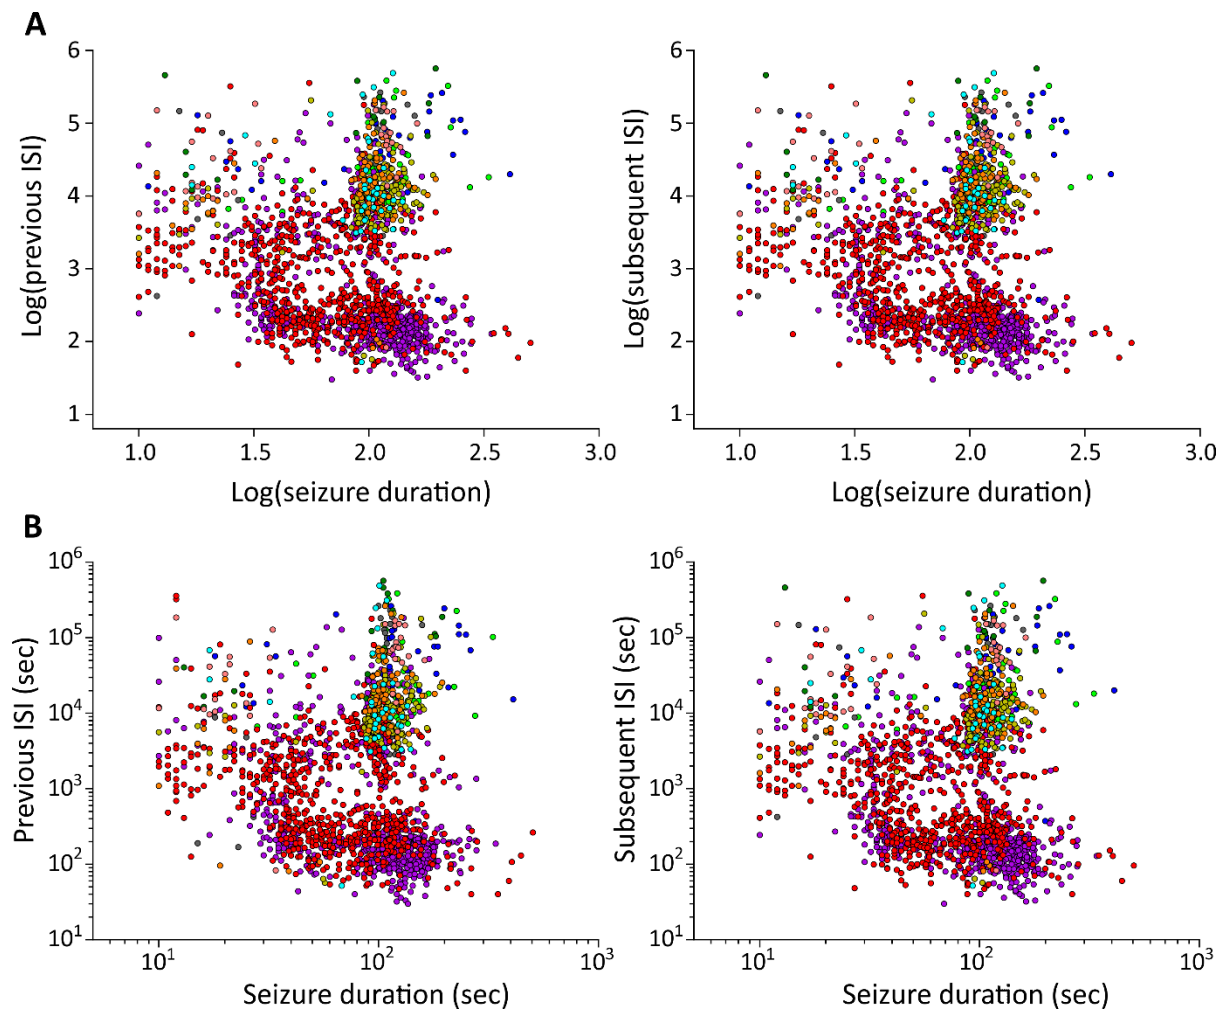

**Figure S3. No obvious correlation between seizure duration and Inter Seizure Interval (ISI).** Upper: Scatter plot of log of seizure duration with log of previous (left) and subsequent (right) ISI. Lower: Scatter plot of seizure duration with previous (left) and subsequent (right) ISI.

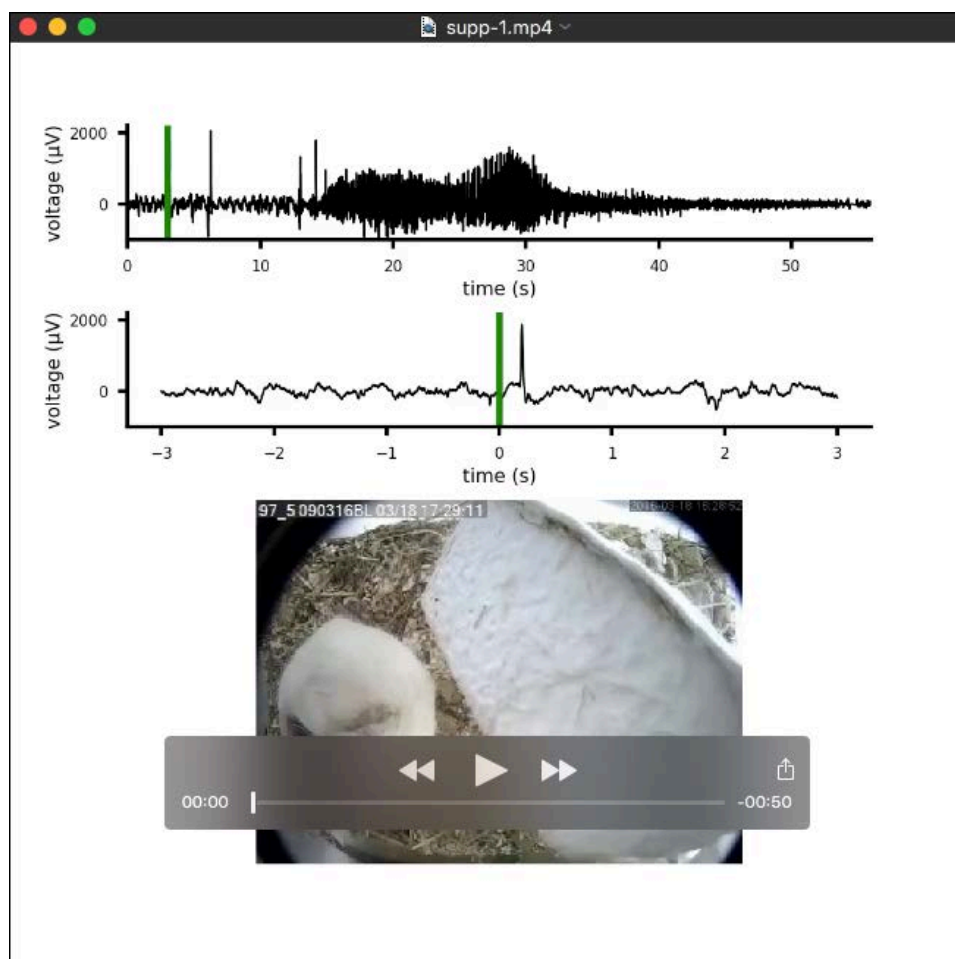

**Movie 1.** Non-motor seizure

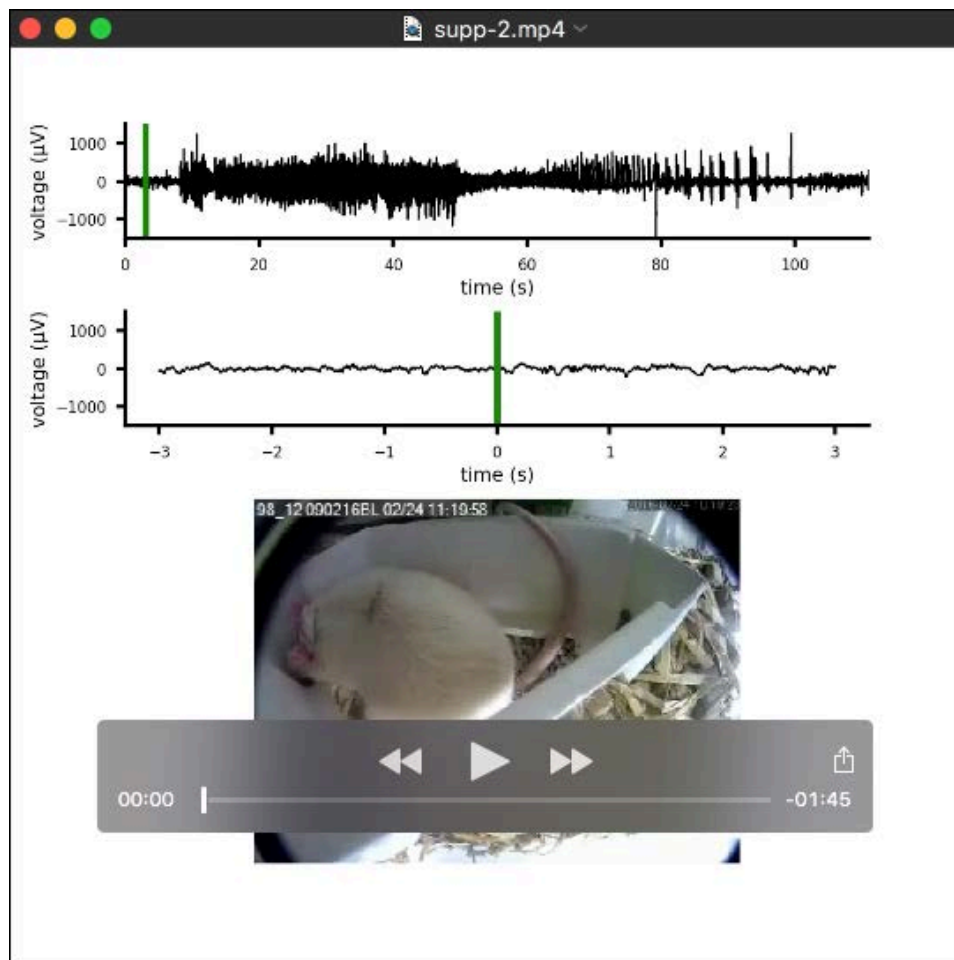

**Movie 2.** Focal seizure evolving to generalized tonic-clonic seizure
